# Supplementary material for: GRSF1 Regulates RNA Processing in Mitochondrial RNA Granules
Source: PubMed Central journal article supplement (PMC3593211; doi:10.1016/j.cmet.2013.02.005), 2013-03-05
Supplement: mmc1.pdf [file mmc1.pdf]

## **Supplemental Information**

### **GRSF1 Regulates RNA Processing in Mitochondrial RNA Granules**

**Alexis A. Jourdain, Mirko Koppen, Mateusz Wydro, Chris D. Rodley,  
Robert N. Lightowlers, Zofia M. Chrzanowska-Lightowlers, and Jean-Claude Martinou**

## **Inventory of Supplemental Information**

- Figure S1 : Analysis of GRSF1 isoforms in different cell lines. Related to Figure 1.
- Figure S2 : Analysis of GRSF1 in 143B  $\rho^0$  cells. Related to Figure 2.
- Figure S3 : GRSF1 does not co-localize with RNase Z and is not associated with mitochondrial ribosomes. Related to Figure 4.
- Figure S4 : MRPP1 knock-down. Related to Figure 5.
- Figure S5 : Effect of MRPP1 RNAi and translation inhibition on BrU pulse-chase. Related to Figure 7.
- Table S1 : Putative GRSF1-interacting proteins. Related to Figure 4.
- Table S2 : Related to the Experimental Procedures.

## Supplemental Figures

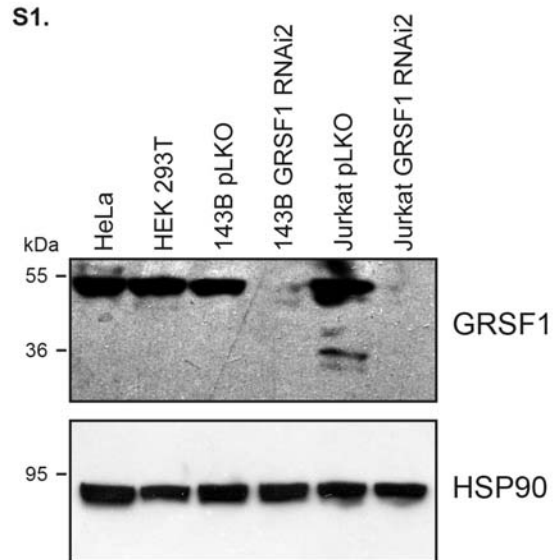

**Figure S1 : Analysis of GRSF1 isoforms in different cell lines.** Immunoblot analysis of GRSF1 isoforms in HeLa, HEK 293T, 143B and Jurkat cells. Cells were infected with lentiviruses carrying an empty vector (pLKO) or a shRNA against GRSF1 (RNAi2). No low molecular weight form of GRSF1 was observed in HeLa, HEK 293T or 143B cells, even after a long exposure time.

S2.

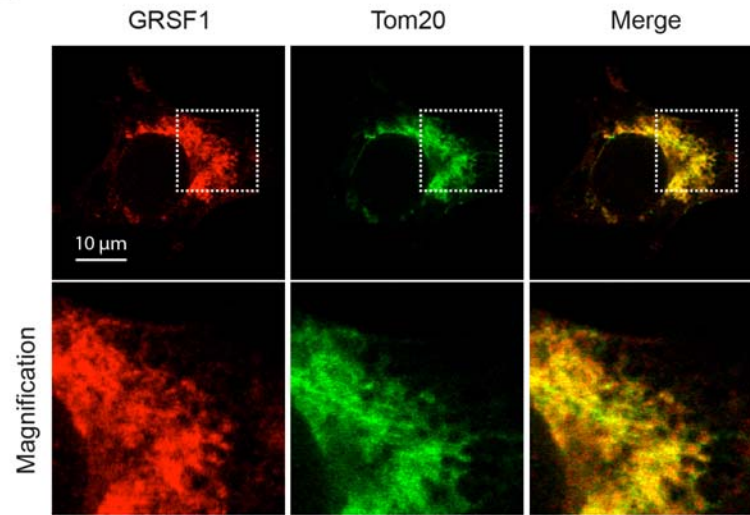

**Figure S2 : Analysis of GRSF1 in 143B  $\rho^0$  cells.** 143B  $\rho^0$  cells were immunolabeled with antibodies against GRSF1 and Tom20.

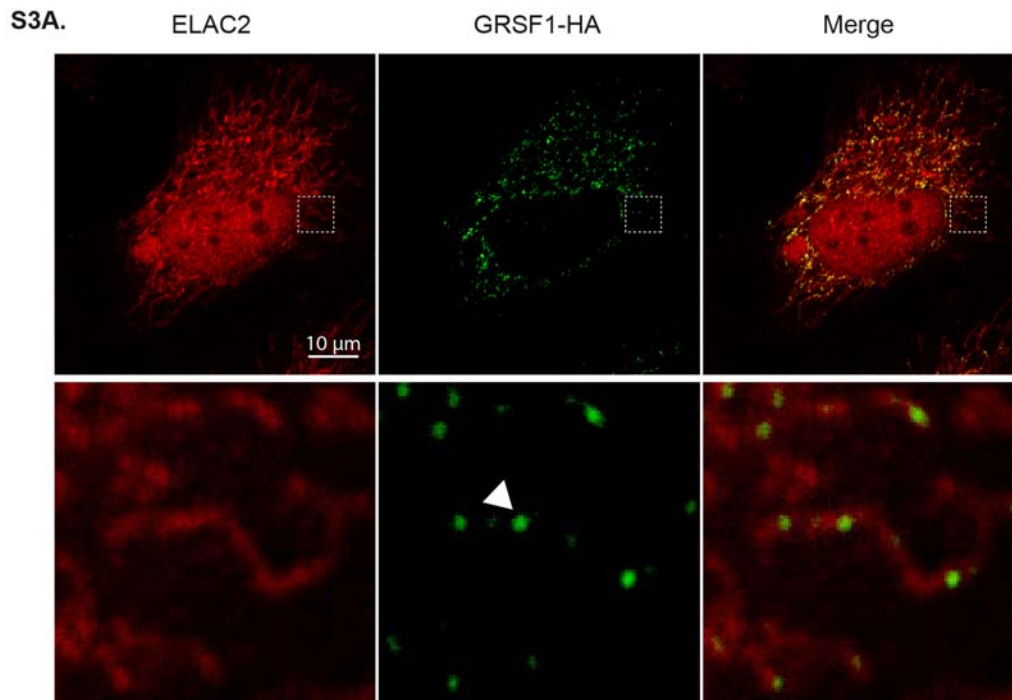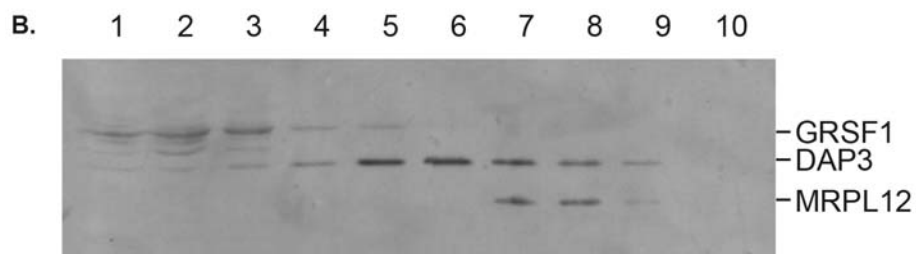

**Figure S3 : GRSF1 does not co-localize with RNase Z and is not associated with mitochondrial ribosomes.** A. Immunolabeling of HeLa cells transfected with GRSF1-HA using anti-HA and anti-ELAC2 antibodies. Arrowhead : mitochondrial foci corresponding to GRSF1. B. Immunoblot analysis of HeLa cell extracts after isokinetic sucrose gradient separation. MRPL12 is a protein of the large mitoribosomal subunit. DAP3 is a protein of the small mitoribosomal subunit. 1: top fraction (low molecular weight), 10: bottom fraction (high molecular weight).

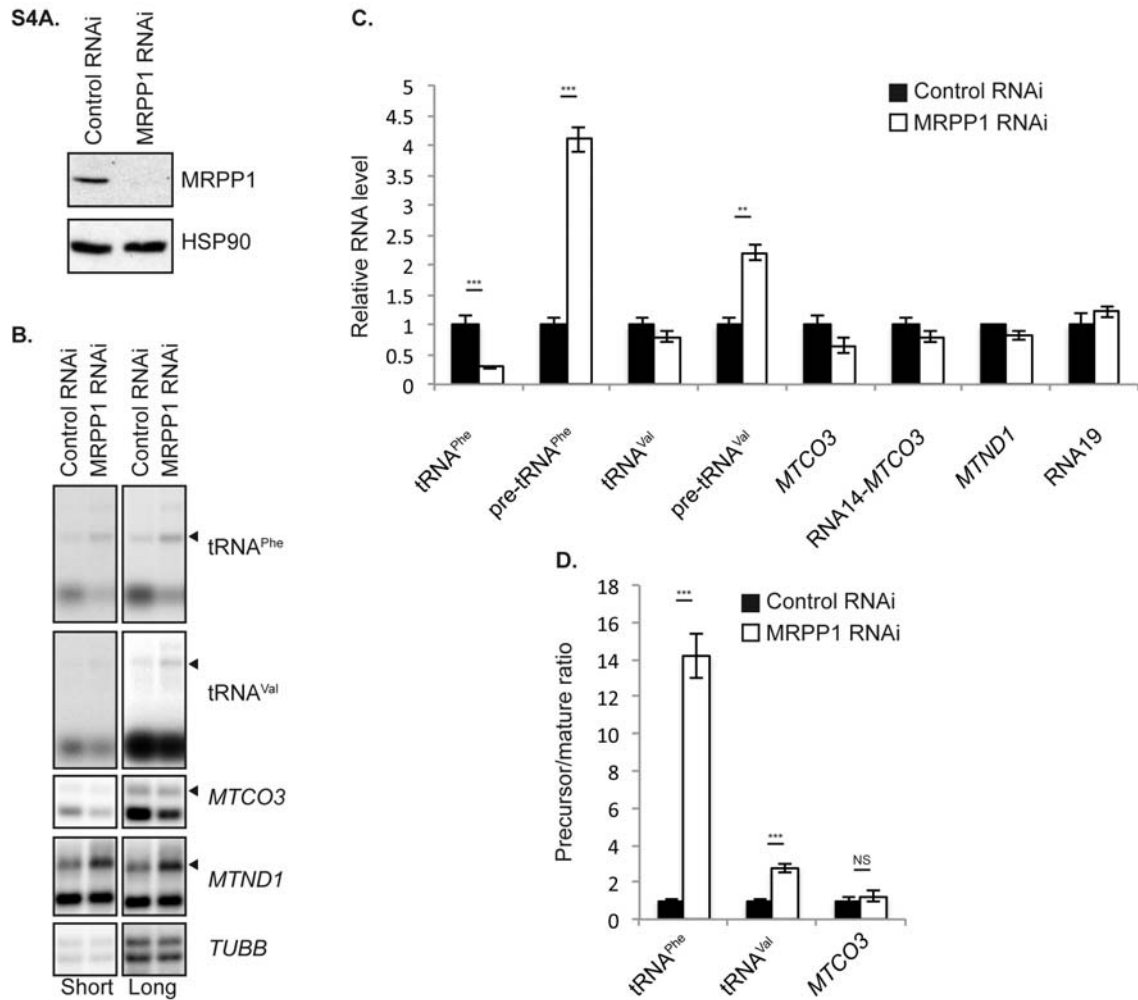

**Figure S4 : MRPP1 knock-down.** A. Immunoblot analysis of cell lysates prepared from cells transfected with a control RNAi or an RNAi directed against MRPP1. HSP90 was used as a loading control. B. Northern blot analysis of 143B cells treated with control or MRPP1 RNAi using probes for various RNA. Arrowheads indicate RNA precursors. *MTND1* precursor corresponds to RNA19. Short and long correspond to different exposure time. C. Phosphorimager quantification. Data are normalized to tubulin and are shown as mean  $\pm$  SEM (N  $\geq$  3). D. Ratio between precursor and mature RNA, when applicable. Data are shown as mean  $\pm$  SEM (N  $\geq$  3).

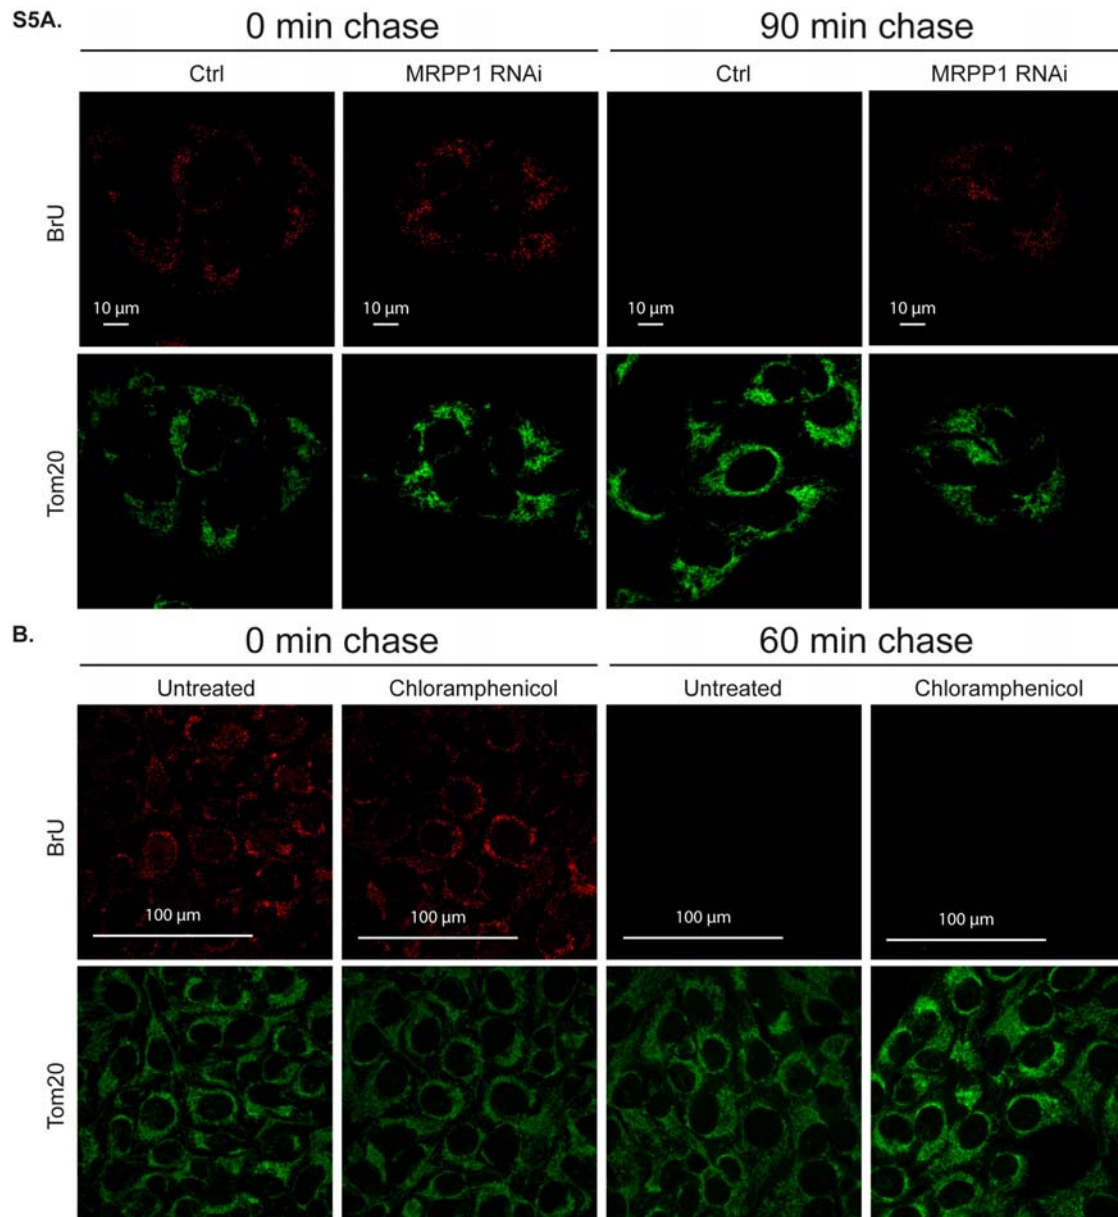

**Figure S5 : Effect of MRPP1 RNAi and translation inhibition on BrU pulse-chase. A.** Confocal analysis of 143B treated with control or MRPP1 RNAi after 60 min of BrU pulse and before (0) or after 90 minutes of chase with uridine. The parameters used for the entire analysis were identical for both conditions. **B.** Confocal analysis of 143B cells cultured in the absence or presence of 20  $\mu\text{g/ml}$  chloramphenicol. Chloramphenicol was maintained during the pulse and the chase. BrU/uridine pulse chase and imaging was monitored as in (A).

**Table S1**

| Rank | Gene     | UNIPROT           | PROT ID        | PROT NAME                                                                       | <u>emPAI value</u> |          |              |
|------|----------|-------------------|----------------|---------------------------------------------------------------------------------|--------------------|----------|--------------|
|      |          |                   |                |                                                                                 | Control IP 1       | GRSF1 IP | Control IP 2 |
| 1    | HSD17B10 | Q99714            | NP_004484.1    | hydroxysteroid (17-beta) dehydrogenase 10 isoform 1 (RNaseP MRPP2)              | 0.71               | 35.87    | 0.71         |
| 2    | GRSF1    | Q12849-2          | NP_002083.2    | G-rich RNA sequence binding factor 1                                            | 0.00               | 26.83    | 0.53         |
| 3    | RG9MTD1  | Q9NRG5            | NP_060289.2    | RNA (guanine-9-) methyltransferase domain containing 1 (RNaseP MRPP1)           | 0.05               | 8.15     | 0.00         |
| 4    | MRPS26   | Q9BYN8            | NP_110438.1    | mitochondrial ribosomal protein S26                                             | 1.25               | 6.63     | 0.31         |
| 5    | MRPL11   | Q9Y3B7            | NP_057134.1    | mitochondrial ribosomal protein L11 isoform a                                   | 0.25               | 6.20     | 0.00         |
| 6    | TFAM     | Q00059            | NP_003192.1    | transcription factor A, mitochondrial                                           | 0.30               | 6.02     | 0.43         |
| 7    | NME4     | O00746            | NP_005000.1    | nucleoside-diphosphate kinase 4                                                 | 0.00               | 5.45     | 0.00         |
| 8    | MRPS25   | P82663            | NP_071942.1    | mitochondrial ribosomal protein S25                                             | 1.00               | 5.31     | 0.12         |
| 9    | HSPA9    | P38646            | NP_004125.3    | heat shock 70kDa protein 9B precursor                                           | 0.96               | 4.10     | 0.80         |
| 10   | RPL28    | P46779            | NP_000982.2    | ribosomal protein L28                                                           | 0.00               | 4.01     | 0.00         |
| 11   | RPL14    | P50914            | NP_001030168.1 | ribosomal protein L14                                                           | 0.00               | 3.22     | 0.00         |
| 12   | MRPS34   | P82930            | NP_076425.1    | mitochondrial ribosomal protein S34                                             | 0.10               | 3.22     | 0.10         |
| 13   | MRPS22   | P82650            | NP_064576.1    | mitochondrial ribosomal protein S22                                             | 0.92               | 3.06     | 0.35         |
| 14   | MRPL47   | Q9HD33            | NP_065142.2    | mitochondrial ribosomal protein L47 isoform a                                   | 0.23               | 2.90     | 0.00         |
| 15   | RNMTL1   | Q9HC36            | NP_060616.1    | RNA methyltransferase like 1                                                    | 0.00               | 2.87     | 0.00         |
| 16   | MRPL48   | Q96GC5            | NP_057139.1    | mitochondrial ribosomal protein L48                                             | 0.47               | 2.59     | 0.29         |
| 17   | MRPS7    | Q9Y2R9            | NP_057055.1    | mitochondrial ribosomal protein S7                                              | 0.53               | 2.59     | 0.19         |
| 18   | ATP5B    | P06576            | NP_001677.2    | ATP synthase, H+ transporting, mitochondrial F1 complex, beta subunit precursor | 0.87               | 2.51     | 1.39         |
| 19   | ATP5O    | P48047            | NP_001688.1    | mitochondrial ATP synthase, O subunit precursor                                 | 0.78               | 2.16     | 0.00         |
| 20   | MRPS31   |                   | NP_005821.1    | mitochondrial ribosomal protein S31                                             | 0.33               | 1.99     | 0.19         |
| 21   | ACOT9    |                   | NP_001028755.2 | acyl-Coenzyme A thioesterase 2, mitochondrial isoform b                         | 0.00               | 1.98     | 0.08         |
| 22   | HADHA    | P40939            | NP_000173.2    | mitochondrial trifunctional protein, alpha subunit precursor                    | 0.16               | 1.97     | 0.19         |
| 23   | C1QBP    | Q07021            | NP_001203.1    | complement component 1, q subcomponent binding protein precursor                | 0.19               | 1.89     | 1.22         |
| 24   | HARS2    | P49590            | NP_036340.1    | histidyl-tRNA synthetase-like                                                   | 0.00               | 1.87     | 0.00         |
| 25   | MRPS15   | P82914            | NP_112570.2    | mitochondrial ribosomal protein S15                                             | 0.33               | 1.61     | 0.21         |
| 26   | MRPS2    | Q9Y399<br>Q7L2E3- | NP_057118.1    | mitochondrial ribosomal protein S2                                              | 0.00               | 1.55     | 0.33         |
| 27   | DHX30    |                   | NP_619519.1    | DEAH (Asp-Glu-Ala-His) box polypeptide 30 isoform 3                             | 0.00               | 1.54     | 0.10         |
| 28   | PTCD3    | Q96EY7            | NP_060422.4    | Pentatricopeptide repeat domain 3                                               | 0.25               | 1.53     | 0.25         |
| 29   | MRPL24   | Q96A35            | NP_663781.1    | mitochondrial ribosomal protein L24                                             | 0.00               | 1.47     | 0.00         |
| 30   | MRPS27   | Q92552            | NP_055899.1    | mitochondrial ribosomal protein S27                                             | 0.36               | 1.32     | 0.30         |
| 31   | PAPD1    | Q9HA74            | NP_060579.2    | PAP associated domain containing 1                                              | 0.00               | 1.23     | 0.00         |
| 32   | MRPL2    | Q5T653            | NP_057034.2    | mitochondrial ribosomal protein L2                                              | 0.00               | 1.22     | 0.19         |
| 33   | MRPL21   | A6NKU0            | NP_852615.1    | mitochondrial ribosomal protein L21 isoform d                                   | 0.09               | 1.22     | 0.00         |
| 34   | DAP3     | P51398            | NP_387506.1    | death-associated protein 3                                                      | 0.39               | 1.12     | 0.26         |
| 35   | MRPL4    | Q9BYD3            | NP_057040.2    | mitochondrial ribosomal protein L4 isoform a                                    | 0.31               | 1.11     | 0.07         |
| 36   | PNPT1    | Q8TCS8            | NP_149100.1    | polyribonucleotide nucleotidyltransferase 1                                     | 0.08               | 1.04     | 0.03         |
| 37   | MRPL28   | Q13084            | NP_006419.2    | mitochondrial ribosomal protein L28                                             | 0.00               | 1.03     | 0.00         |
| 38   | MDH2     | P40926            | NP_005909.2    | mitochondrial malate dehydrogenase precursor                                    | 0.43               | 1.03     | 0.19         |
| 39   | MRPS28   | Q9Y2Q9            | NP_054737.1    | mitochondrial ribosomal protein S28                                             | 0.49               | 1.02     | 0.22         |

**Table S1: Putative GRSF1-interacting proteins.** Ranked list of the proteins co-immunoprecipitating with GRSF1-FLAG, according to their emPAI value.
